# Supplementary material for: Blastocyst quality and reproductive and perinatal outcomes: a multinational multicentre observational study
Source: Oxford University Press journal article supplement (doi:10.1093/humrep/dead212), 2023-10-24
Supplement: dead212_supplementary_table_s1.pdf [file dead212_supplementary_table_s1.pdf]

Supplementary Table S1. Association between different low-grade blastocysts and reproductive outcomes.

| Outcomes           | Good-grade<br>(N = 4386) | AC (N = 27) | CA (N = 12) | BC (N = 1972)            | CB (N = 715)             | CC (N = 117)             |
|--------------------|--------------------------|-------------|-------------|--------------------------|--------------------------|--------------------------|
| Live birth         | 1946 (44.4%)             | 9 (33.3%)   | 4 (33.3%)   | 653 (33.1%)              | 176 (24.6%)              | 16 (13.7%)               |
| Crude OR           | Reference                | /           | /           | <b>0.62</b> (0.56–0.69)  | <b>0.41</b> (0.34–0.49)  | <b>0.20</b> (0.12–0.34)  |
| Adjusted OR        | Reference                | /           | /           | <b>0.53</b> (0.46–0.63)* | <b>0.35</b> (0.28–0.43)* | <b>0.30</b> (0.18–0.52)* |
| Clinical pregnancy | 2268 (51.7%)             | 9 (33.3%)   | 4 (33.3%)   | 866 (43.9%)              | 251 (35.1%)              | 19 (16.2%)               |
| Crude OR           | Reference                | /           | /           | <b>0.73</b> (0.66–0.81)  | <b>0.51</b> (0.43–0.60)  | <b>0.18</b> (0.11–0.30)  |
| Adjusted OR        | Reference                | /           | /           | <b>0.54</b> (0.46–0.63)* | <b>0.37</b> (0.30–0.45)* | <b>0.32</b> (0.19–0.53)* |
| Multiple birth     | 19 (0.4%)                | 0           | 0           | 14 (0.7%)                | 1 (0.1%)                 | 0                        |
| Crude OR           | Reference                | /           | /           | 1.64 (0.82–3.28)         | 0.32 (0.04–2.41)         | /                        |
| Adjusted OR        | Reference                | /           | /           | 1.49 (0.59–3.72)*        | 0.36 (0.04–3.16)*        | /                        |
| Pregnancy loss     | 322 (7.3%)               | 0           | 0           | 213 (10.8%)              | 75 (10.5%)               | 3 (2.6%)                 |
| Crude OR           | Reference                | /           | /           | <b>1.53</b> (1.27–1.84)  | <b>1.48</b> (1.14–1.93)  | 0.33 (0.10–1.05)         |
| Adjusted OR        | Reference                | /           | /           | 1.01 (0.78–1.30)*        | 0.99 (0.71–1.37)*        | 0.69 (0.21–2.23)*        |

We did not perform regression analysis for AC or CA group due to small numbers.

\* Adjusted for institute, female age, fresh/frozen transfer, blastocyst developmental stage, blastocyst age.

OR, odds ratio. Results in bold are  $P < 0.05$ . Crude OR is calculated without any confounders. Bold values refer to statistically significant results.
