# Supplementary material for: Blastocyst quality and reproductive and perinatal outcomes: a multinational multicentre observational study
Source: Oxford University Press journal article supplement (doi:10.1093/humrep/dead212), 2023-10-24
Supplement: dead212_supplementary_table_s2.pdf [file dead212_supplementary_table_s2.pdf]

**Supplementary Table S2.** Live birth rates in stratified age groups associated with the blastocysts grading.

| Age (quintile) | Good (N = 4386) | Moderate (N = 3735) | Low (N = 2843) |
|----------------|-----------------|---------------------|----------------|
| 20–29          | 542 (52.9%)     | 440 (46.9%)         | 267 (37.0%)    |
| 30–31          | 316 (49.3%)     | 283 (43.9%)         | 178 (39.4%)    |
| 32–34          | 460 (45.5%)     | 341 (42.6%)         | 194 (31.3%)    |
| 35–37          | 346 (40.9%)     | 224 (35.0%)         | 133 (27.8%)    |
| ≥38            | 282 (32.7%)     | 155 (21.8%)         | 86 (15.1%)     |
