# Supplementary material for: Blastocyst quality and reproductive and perinatal outcomes: a multinational multicentre observational study
Source: Oxford University Press journal article supplement (doi:10.1093/humrep/dead212), 2023-10-24
Supplement: dead212_supplementary_table_s3.pdf [file dead212_supplementary_table_s3.pdf]

**Supplementary Table S3.** Sensitivity analysis on the association between blastocyst grading and multiple births.

| Outcomes              | Overall blastocyst grading |                         |                   | ICM grading  |                           |                    | TE grading   |                     |                     |
|-----------------------|----------------------------|-------------------------|-------------------|--------------|---------------------------|--------------------|--------------|---------------------|---------------------|
|                       | Good (N = 1946)            | Moderate (N = 1443)     | Low (N = 858)     | A (N = 1667) | B (N = 2384)              | C (N = 196)        | A (N = 1368) | B (N = 2201)        | C (N = 678)         |
| <b>Multiple birth</b> | 19 (1.0%)                  | 34 (2.4%)               | 15 (1.8%)         | 14 (0.8%)    | 53 (2.2%)                 | 1 (0.5%)           | 15 (1.1%)    | 39 (1.8%)           | 14 (2.1%)           |
| <b>Crude OR</b>       | Reference                  | <b>2.45</b> (1.39–4.31) | 1.80 (0.91–3.57)  | Reference    | <b>2.68</b> (1.48–4.85)   | 0.61 (0.08–4.63)   | Reference    | 1.63 (0.89–2.96)    | 1.90 (0.91–3.96)    |
| <b>Adjusted OR</b>    | Reference                  | 1.96 (0.93–4.11)*       | 1.60 (0.64–4.01)* | Reference    | <b>2.41</b> (1.08–5.38)** | 0.69 (0.07–6.47)** | Reference    | 0.93 (0.48–1.83)*** | 0.91 (0.38–2.13)*** |

\* Adjusted for institute, female age, fresh/frozen transfer, blastocyst developmental stage, blastocyst age.

\*\* Adjusted for institute, female age, fresh/frozen transfer, blastocyst developmental stage, blastocyst age, TE grade.

\*\*\* Adjusted for institute, female age, fresh/frozen transfer, blastocyst developmental stage, blastocyst age, ICM grade.

Live birth was the unit of analysis in this sensitivity analysis.

Bold values refer to statistically significant results.
