# Supplementary material for: Blastocyst quality and reproductive and perinatal outcomes: a multinational multicentre observational study
Source: Oxford University Press journal article supplement (doi:10.1093/humrep/dead212), 2023-10-24
Supplement: dead212_supplementary_table_s4.pdf [file dead212_supplementary_table_s4.pdf]

Supplementary Table S4. Association between different low-grade blastocysts and perinatal outcomes.

| Outcomes                       | Good (N = 1893) | AC (N = 9) | CA (N = 4) | BC (N = 637)            | CB (N = 175)            | CC (N = 16) |
|--------------------------------|-----------------|------------|------------|-------------------------|-------------------------|-------------|
| Preterm birth                  | 122 (6.4%)      | 1 (11.1%)  | 1 (25.0%)  | 51 (8.0%)               | 15 (8.6%)               | 0           |
| Crude OR                       | Reference       | /          | /          | 1.26 (0.90–1.77)        | 1.36 (0.78–2.38)        | /           |
| Adjusted OR                    | Reference       | /          | /          | 0.97 (0.61–1.53)*       | 1.09 (0.56–2.10)*       | /           |
| Birthweight Z-score, mean (SD) | 0.4 (1.1)       | 0.4 (0.9)  | –0.2 (0.6) | 0.6 (1.0)               | 0.8 (1.0)               | 0.5 (0.9)   |
| Coefficient (crude)            | Reference       | /          | /          | <b>0.27</b> (0.18–0.37) | <b>0.40</b> (0.24–0.56) | /           |
| Coefficient (adjusted)         | Reference       | /          | /          | 0.01 (–0.12 to 0.13)*   | 0.13 (–0.06 to 0.31)*   | /           |
| Birthweight (VLBW/LBWNBW/HBW)  |                 |            |            |                         |                         |             |
| NBW                            | Reference       | Reference  | Reference  | Reference               | Reference               | Reference   |
| VLBW                           | 17 (0.9%)       | 0          | 0          | 4 (0.6%)                | 1 (0.6%)                | 0           |
| Crude OR                       | Reference       | /          | /          | 0.70 (0.24–2.10)        | 0.62 (0.08–4.71)        | /           |
| Adjusted OR                    | Reference       | /          | /          | 0.86 (0.21–3.63)*       | 1.10 (0.11–10.66)*      | /           |
| LBW                            | 87 (4.6%)       | 0          | 1 (25.0%)  | 31 (4.9%)               | 7 (4.0%)                | 0           |
| Crude OR                       | Reference       | /          | /          | 1.07 (0.70–1.62)        | 0.85 (0.39–1.87)        | /           |
| Adjusted OR                    | Reference       | /          | /          | 1.03 (0.58–1.82)*       | 0.78 (0.32–1.93)*       | /           |
| HBW                            | 31 (1.6%)       | 0          | 0          | 15 (2.4%)               | 1 (0.6%)                | 0           |
| Crude OR                       | Reference       | /          | /          | 1.45 (0.78–2.70)        | 0.34 (0.05–2.52)        | /           |
| Adjusted OR                    | Reference       | /          | /          | 1.32 (0.52–3.37)*       | 0.19 (0.02–1.68)*       | /           |
| Birthweight (SGA/AGA/LGA)      |                 |            |            |                         |                         |             |
| AGA                            | Reference       | Reference  | Reference  | Reference               | Reference               | Reference   |
| SGA                            | 130 (6.9%)      | 1 (11.1%)  | 0          | 22 (3.5%)               | 4 (2.3%)                | 0           |
| Crude OR                       | Reference       | /          | /          | <b>0.54</b> (0.34–0.86) | 0.38 (0.14–1.04)        | /           |
| Adjusted OR                    | Reference       | /          | /          | 1.87 (0.99–3.54)*       | 1.65 (0.53–5.11)*       | /           |
| LGA                            | 331 (17.5%)     | 1 (11.11%) | 0          | 167 (26.2%)             | 54 (30.9%)              | 4 (25.0%)   |
| Crude OR                       | Reference       | /          | /          | <b>1.61</b> (1.30–2.00) | <b>2.00</b> (1.42–2.82) | /           |
| Adjusted OR                    | Reference       | /          | /          | 1.26 (0.93–1.70)*       | 1.57 (1.04–2.37)*       | /           |

We did not perform regression analysis for AC, CA, or CC group due to small numbers.

\* Adjusted for institute, female age, fresh/frozen transfer, blastocyst developmental stage, blastocyst age, infant gender.  
 OR, odds ratio; VLBW: very low birth rate; LBW: low birth rate; NBW: normal birth weight; HBW: high birth weight; SGA: small for gestational age; AGA: appropriate for gestational age; LGA: large for gestational age. Results in bold are P<0.05. Crude OR is calculated without any confounders.  
 Bold values refer to statistically significant results.
