# Supplementary material for: Blastocyst quality and reproductive and perinatal outcomes: a multinational multicentre observational study
Source: Oxford University Press journal article supplement (doi:10.1093/humrep/dead212), 2023-10-24
Supplement: dead212_supplementary_table_s5.pdf [file dead212_supplementary_table_s5.pdf]

**Supplementary Table S5.** Association between different age blastocysts and reproductive and perinatal outcomes.

| Outcomes                   | D5 low quality embryos (N = 1736) | D6 low quality embryos (N = 1078) | Adjusted OR           |
|----------------------------|-----------------------------------|-----------------------------------|-----------------------|
| <b>Live birth</b>          | 589 (33.9%)                       | 269 (25.0%)                       | 0.58 (0.48–0.70)      |
| <b>Clinical pregnancy</b>  | 778 (44.8%)                       | 370 (34.3%)                       | 0.57 (0.47–0.68)      |
| <b>Miscarriage</b>         | 189 (10.9%)                       | 101 (9.4%)                        | 0.83 (0.63–1.09)      |
|                            | D5 low quality embryos (N = 577)  | D6 low quality embryos (N = 264)  |                       |
| <b>Preterm birth</b>       | 47 (8.2%)                         | 21 (8.0%)                         | 1.18 (0.65–2.13)      |
| <b>Birthweight Z-score</b> | 0.7 (0.5)                         | 0.3 (0.5)                         | −0.12 (−0.27 to 0.04) |
| <b>VLBW</b>                | 2 (0.4%)                          | 3 (1.1%)                          | 3.43 (0.41–28.51)     |
| <b>LBW</b>                 | 23 (4.0%)                         | 16 (6.1%)                         | 1.71 (0.84–3.48)      |
| <b>NBW</b>                 | 541 (93.8%)                       | 240 (90.9%)                       | Reference             |
| <b>HBW</b>                 | 11 (1.9%)                         | 5 (1.9%)                          | 0.75 (0.22–2.59)      |
| <b>SGA</b>                 | 17 (3.0%)                         | 10 (3.8%)                         | 1.91 (0.77–4.74)      |
| <b>AGA</b>                 | 405 (70.2%)                       | 183 (69.3%)                       | Reference             |
| <b>LGA</b>                 | 155 (26.9%)                       | 71 (26.9%)                        | 1.00 (0.70–1.43)      |

D5 low quality blastocysts group was the reference group for all comparisons.  
 Adjusted for institute, female age, fresh/frozen transfer, blastocyst developmental stage; infant gender was adjusted for perinatal outcomes.
